# Supplementary material for: Development of an intervention delivered by mobile phone aimed at decreasing unintended pregnancy among young people in three lower middle income countries
Source: Springer Nature journal article supplement (doi:10.1186/s12889-018-5477-7), 2018-05-02
Supplement: MOESM3 [file 15733214]

### Additional file 3. Matrix of change objectives

|                                 | Determinants                                                                                                                                                                 |                                                                                                                                                                                                                                                                                                                                                                                                                                                                                                        |                                                                                                |                                                                                                                                          |
|---------------------------------|------------------------------------------------------------------------------------------------------------------------------------------------------------------------------|--------------------------------------------------------------------------------------------------------------------------------------------------------------------------------------------------------------------------------------------------------------------------------------------------------------------------------------------------------------------------------------------------------------------------------------------------------------------------------------------------------|------------------------------------------------------------------------------------------------|------------------------------------------------------------------------------------------------------------------------------------------|
| Performance objectives          |                                                                                                                                                                              |                                                                                                                                                                                                                                                                                                                                                                                                                                                                                                        |                                                                                                |                                                                                                                                          |
|                                 | Knowledge                                                                                                                                                                    | Attitude                                                                                                                                                                                                                                                                                                                                                                                                                                                                                               | Intention                                                                                      | Personal agency                                                                                                                          |
| <i>Young people...</i>          | <i>Behavioral outcome 1: Use effective contraception</i>                                                                                                                     |                                                                                                                                                                                                                                                                                                                                                                                                                                                                                                        |                                                                                                |                                                                                                                                          |
| <i>po1.1 Choose a method</i>    | <p>k1.1.1 Name the effective methods</p> <p>k1.1.2 Describe how the effective methods work</p> <p>k1.1.3 List the risks &amp; benefits of the range of effective methods</p> | <p>a1.1.1 Express positive attitudes towards the effective methods</p> <p>a1.1.2 Recognise that hormonal methods are not less healthy than non-hormonal methods</p> <p>a1.1.3 Differentiate between real potential side-effects and misconceptions</p> <p>a1.1.4 Recognise that an experience of side-effects in one method may not occur in another method</p>                                                                                                                                        | <p>i1.1.1 Assess options</p> <p>i1.1.2 Express intention to choose effective contraception</p> | <p>pa1.1.0 Express personal agency in choosing an effective method despite fears of being judged by society (married or not married)</p> |
| <i>po1.2 Acquire the method</i> | <p>k1.2.0 List services that provide effective contraception</p>                                                                                                             | <p>a1.2.1/a2.1.1 Question whether not attending a service because of fear of being judged by providers is worth the risk of unintended pregnancy</p> <p>a1.2.2 Question whether not using effective contraception because of fear of being judged by society (whether married or unmarried) is worth the risk of unintended pregnancy</p> <p>a1.2.3 Recognise that it is better to withhold assumptions about the affordability of contraception until the price has been confirmed by the service</p> | <p>i1.2.0 Express intention to acquire effective contraception</p>                             |                                                                                                                                          |

|                                                     | Determinants                                                                          |                                                                                                                                                                                                                                                                                                                                        |                                                                                                                                                                        |                                                                 |
|-----------------------------------------------------|---------------------------------------------------------------------------------------|----------------------------------------------------------------------------------------------------------------------------------------------------------------------------------------------------------------------------------------------------------------------------------------------------------------------------------------|------------------------------------------------------------------------------------------------------------------------------------------------------------------------|-----------------------------------------------------------------|
| Performance objectives                              |                                                                                       |                                                                                                                                                                                                                                                                                                                                        |                                                                                                                                                                        |                                                                 |
|                                                     | Knowledge                                                                             | Attitude                                                                                                                                                                                                                                                                                                                               | Intention                                                                                                                                                              | Personal agency                                                 |
| <i>po1.3 Use the method correctly</i>               | k1.3.0 Describe how methods are used                                                  |                                                                                                                                                                                                                                                                                                                                        | i1.3.0 Express intention to use effective contraception                                                                                                                | pa1.3.0 Express personal agency in using methods correctly      |
|                                                     | <i>Behavioral outcome 2: Access reproductive health services</i>                      |                                                                                                                                                                                                                                                                                                                                        |                                                                                                                                                                        |                                                                 |
| <i>po2.1 Locate a service</i>                       | k1.2.0/2.1.0 List services that provide effective contraception                       | a2.1.1/a1.2.1<br>Question whether not attending a service because of fear of being judge by providers is worth the risk of unintended pregnancy<br><br>a2.1.2 Understand that it is fundamental to providers' job to maintain confidentiality<br><br>(B)a2.1.3 Debate cultural norm of not accessing services until something is wrong | i2.1.0 Express intention to locate a service                                                                                                                           |                                                                 |
| <i>po2.2 Travel to the service</i>                  |                                                                                       |                                                                                                                                                                                                                                                                                                                                        | i2.2.0 Plan travel to the service<br><br>i2.2.1 Recognise that it is possible for young people (married or not married) to travel to services while preserving privacy | pa2.2.0 Express personal agency in travelling to the service    |
| <i>po2.3 Communicate effectively with providers</i> |                                                                                       |                                                                                                                                                                                                                                                                                                                                        |                                                                                                                                                                        | pa2.3.0 Express personal agency in communicating with providers |
|                                                     | <i>Behavioral outcome 3: Communicate with partners about contraception before sex</i> |                                                                                                                                                                                                                                                                                                                                        |                                                                                                                                                                        |                                                                 |

|                                                        | <b>Determinants</b> |                                                                                                                                                                                                                                                             |                                                                                               |                                                                                                          |
|--------------------------------------------------------|---------------------|-------------------------------------------------------------------------------------------------------------------------------------------------------------------------------------------------------------------------------------------------------------|-----------------------------------------------------------------------------------------------|----------------------------------------------------------------------------------------------------------|
| <b>Performance objectives</b>                          |                     |                                                                                                                                                                                                                                                             |                                                                                               |                                                                                                          |
|                                                        | <b>Knowledge</b>    | <b>Attitude</b>                                                                                                                                                                                                                                             | <b>Intention</b>                                                                              | <b>Personal agency</b>                                                                                   |
| <i>po3.1 Initiate conversation with partner</i>        |                     | a3.1.1 Question whether refraining from initiating a conversation about contraception with a partner is worth the risk of unintended pregnancy<br><br>(B)a3.1.3 Assess whether having sex without using effective contraception is really a “proof of love” | i3.1.0 Express intention to initiate conversation about effective contraception with partners | pa3.1.0 Express personal agency in initiating a conversation about effective contraception with partners |
| <i>po3.2 State own fertility preferences</i>           |                     |                                                                                                                                                                                                                                                             | i3.2.0 Express intention to clearly state own fertility preferences with partner              | pa3.2.0 Express personal agency in clearly stating own fertility preferences to partner                  |
| <i>po3.3 Listen to partner’s fertility preferences</i> |                     |                                                                                                                                                                                                                                                             | i3.3.0 Express intention to listen to partner’s fertility preferences                         | pa3.3.0 Express personal agency in listening to partners talk about their fertility preferences          |

(B) Bolivia only
