# Supplementary material for: Development of an intervention delivered by mobile phone aimed at decreasing unintended pregnancy among young people in three lower middle income countries
Source: Springer Nature journal article supplement (doi:10.1186/s12889-018-5477-7), 2018-05-02
Supplement: MOESM4 [file 15733214]

**Additional file 4. Behaviour change methods**

| <b>Method</b>      | <b>Definition</b>                                                                                                           | <b>The basis upon which the method was selected</b>               | <b>Determinant</b>                              | <b>Parameters</b>                                                                                                                                                                              | <b>How the parameters were taken into account</b>                                                                              |
|--------------------|-----------------------------------------------------------------------------------------------------------------------------|-------------------------------------------------------------------|-------------------------------------------------|------------------------------------------------------------------------------------------------------------------------------------------------------------------------------------------------|--------------------------------------------------------------------------------------------------------------------------------|
| Belief selection   | Using messages designed to strengthen positive beliefs, weaken negative beliefs and introduce new beliefs                   | Theory of planned behaviour, Reasoned action approach             | Knowledge, Attitude                             | Requires investigation of the current attitudinal, normative and efficacy beliefs of the individual before choosing the beliefs on which to intervene                                          | Beliefs targeted were identified in the needs assessment                                                                       |
| Facilitation       | Creating an environment that makes the action easier or reduces barriers to action                                          | Social cognitive theory, suitability for delivery by text message | Intention, Personal agency                      | Requires real changes in the environment instead of perceptions of the environment; requires the identification of barriers and facilitators and the power for making the appropriate changes. | Cannot produce real changes in the environment but provides advice on how they can change their environment to remove barriers |
| Anticipated regret | Stimulating individuals to focus on their feelings after unintended risky behaviour, before any losses actually materialise | Theory of planned behaviour, Reasoned action approach             | Knowledge, Attitude, Intention, Personal agency | Stimulation of imagery; assumes a positive intention to avoid the risky behaviour                                                                                                              | Cannot be certain that the individual intends to avoid the behaviour. However, the intervention aims to influence intention.   |
| Guided practice    | Prompting individuals to rehearse and repeat the behaviour various times, discuss the experience and provide feedback       | Social cognitive theory                                           | Intention, Personal agency                      | Subskill demonstration, instruction and enactment with individual feedback; requires supervision by an experienced person                                                                      | Cannot provide feedback or supervision. However, real quotes from the target group will help participants compare themselves   |

| Method              | Definition                                                                                        | The basis upon which the method was selected | Determinant                           | Parameters                                                                                                                                                | How the parameters were taken into account                                                                                                            |
|---------------------|---------------------------------------------------------------------------------------------------|----------------------------------------------|---------------------------------------|-----------------------------------------------------------------------------------------------------------------------------------------------------------|-------------------------------------------------------------------------------------------------------------------------------------------------------|
|                     |                                                                                                   |                                              |                                       |                                                                                                                                                           | with an example of a conversation that went well.                                                                                                     |
| Verbal persuasion   | Using messages that suggest that the participant possesses certain capabilities                   | Social cognitive theory                      | Intention, Personal agency            | Credible source                                                                                                                                           | Individuals will know that the messages are coming from the organisation and were written the organisation, the University of London and young people |
| Tailoring           | Matching the intervention or components to previously measured characteristics of the participant | Needs assessment                             | Knowledge                             | Tailoring variable or factors related to behaviour change (such as stage) or to relevance (such as culture)                                               | The intervention is based on the needs assessment and is tailored according to marital status and gender                                              |
| Cultural similarity | Using characteristics of the target group in source, message and channel                          | Needs assessment                             | Attitude                              | Using surface characteristics of the target group enhances receptivity. Socio-cultural characteristics leads to a more positive reception of the message. | Quotes from people in the target group are used                                                                                                       |
| Arguments           | Using a set of one or more meaningful premises and a conclusion                                   | Suitability for delivery by text message     | Attitudes, Intention, Personal agency | Arguments need to be new                                                                                                                                  | Cannot be certain that all arguments were new to individuals but they might be                                                                        |

| Method                         | Definition                                                                                                                          | The basis upon which the method was selected                                                                                                                                                                | Determinant     | Parameters                                                                                         | How the parameters were taken into account                                                                                                                                                                                                     |
|--------------------------------|-------------------------------------------------------------------------------------------------------------------------------------|-------------------------------------------------------------------------------------------------------------------------------------------------------------------------------------------------------------|-----------------|----------------------------------------------------------------------------------------------------|------------------------------------------------------------------------------------------------------------------------------------------------------------------------------------------------------------------------------------------------|
| Shifting perspective           | Encouraging taking the perspective of the other                                                                                     | Needs assessment                                                                                                                                                                                            | Personal agency | Initiation from the perspective of the individual; needs imaginary competence                      | Cannot be certain that that the individual has imaginary competence. The needs assessment revealed lack of confidence in communicating with providers so this method prompts individuals to see the situation from the providers' perspective. |
| Goal setting                   | Prompting planning what the person will do, including a definition of goal-directed behaviours that results in the target behaviour | Suitability for delivery by text message                                                                                                                                                                    | Intention       | Commitment to the goal; goals that are difficult but available within the individual's skill level | Cannot know if individuals are committed to the goal or if it is within their skill level. However, it might be.                                                                                                                               |
| Accurate information provision |                                                                                                                                     | Information-Motivation-Behavioural Skills Model; not a method, and generally not an important predictor of behaviour, but in contexts where knowledge is low, providing information may influence behaviour | Knowledge       |                                                                                                    |                                                                                                                                                                                                                                                |
